# Supplementary material for: Husk Separation (Kubessa Method) Impacts the Aging Chemistry of Beer
Source: PubMed Central journal article supplement (PMC11403607; doi:10.1021/acs.jafc.4c05099), 2024-09-02

## Supplementary information

### Husk separation (Kubessa method) impacts the ageing chemistry of beer

#### Contents

|                                                                                                                                                                                                                                 |    |
|---------------------------------------------------------------------------------------------------------------------------------------------------------------------------------------------------------------------------------|----|
| <b>Supplementary Table S1.</b> Overview of the sample nomenclature. Every sample was created in triplicates (_R1 to _R3). .....                                                                                                 | 2  |
| <b>Supplementary Table S2.</b> Values for the established malt, wort and beer attributes. ....                                                                                                                                  | 3  |
| <b>Supplementary Table S3.</b> Parameters for UPLC-separation and ToF-measurements. ....                                                                                                                                        | 10 |
| <b>Supplementary Table S4.</b> Parameters of the UHPLC-ToF-MS data processing using the mzMine3 software. ....                                                                                                                  | 10 |
| <b>Supplementary Table S5.</b> SIRIUS data processing and interpretation parameters. ....                                                                                                                                       | 11 |
| <b>Supplementary Figure S1.</b> Self-organizing map (SOM) clustering of FT-ICR-MS features based on intensity trends during beer aging at time points t0 (finished beer), t1 (2 months), t2 (4 months), and t3 (6 months). .... | 12 |
| <b>Supplementary Figure S2.</b> OPLS-DA statistics of the FT-ICR-MS data with averaged triplicates differentiating beers brewed with the Kubessa method (red) against whole-malt mashing (turquoise). ....                      | 13 |
| <b>Supplementary Figure S3.</b> Statistical analysis of the UPLC-ToF-MS data in triplicates differentiating beers brewed with the Kubessa method (red) against whole-malt mashing (turquoise). ....                             | 14 |
| <b>Supplementary Figure S4.</b> Tandem mass spectra of the compounds most specific for whole-grain mashing (VIP>2.5). ....                                                                                                      | 15 |

## Supplementary Tables

**Supplementary Table S1.** Overview of the sample nomenclature. Every sample was created in triplicates (\_R1 to \_R3).

| Brewing/Aging step | Brewed/bottled at Distelhäuser brewery |                        | Bottled at BLQ* |              |
|--------------------|----------------------------------------|------------------------|-----------------|--------------|
|                    | Kubessa mehod (K)                      | Whole-husk mashing (T) | K               | T            |
| Barley grain       | A                                      |                        |                 |              |
| Barley endosperm   | A_endosperm                            |                        |                 |              |
| Barley husk        | A_husk                                 |                        |                 |              |
| Mash               | K_B                                    | T_B                    |                 |              |
| Sweet wort         | K_C                                    | T_C                    |                 |              |
| Boiled wort        | K_D                                    | T_D                    |                 |              |
| Young beer         | K_E                                    | T_E                    |                 |              |
| Mature beer        | D_K_t0                                 | D_T_t0                 | K_F   B_K_t0    | T_F   B_T_t0 |
| Aged 2 month       | D_K_t1                                 | D_T_t1                 | B_K_t1          | B_T_t1       |
| Aged 4 month       | D_K_t2                                 | D_T_t2                 | B_K_t2          | B_T_t2       |
| Aged 7 month       | D_K_t3                                 | D_T_t3                 | B_K_t3          | B_T_t3       |
| Forced aging       |                                        |                        | B_K_fo          | B_T_fo       |

\* Research Center Weihenstephan for Brewing and Food Quality

**Supplementary Table S2.** Values for the established malt, wort and beer attributes.

| Parameter                       | Unit          | Values                             |         |         |           |         |         |         |         |         |         |         |         |
|---------------------------------|---------------|------------------------------------|---------|---------|-----------|---------|---------|---------|---------|---------|---------|---------|---------|
|                                 |               | Malt (average of three replicates) |         |         |           |         |         |         |         |         |         |         |         |
|                                 |               | whole malt                         |         |         | endosperm |         |         | husk    |         |         |         |         |         |
| Aspartic acid                   | [mg/100 ml]   | 6.92                               |         |         | 6.19      |         |         | 2.38    |         |         |         |         |         |
| Glutamic acid                   | [mg/100 ml]   | 10.81                              |         |         | 9.35      |         |         | 15.93   |         |         |         |         |         |
| Asparagine                      | [mg/100 ml]   | 2.4                                |         |         | 2.74      |         |         | <0,50   |         |         |         |         |         |
| Serine                          | [mg/100 ml]   | 4.2                                |         |         | 4.09      |         |         | 3.67    |         |         |         |         |         |
| Histidine                       | [mg/100 ml]   | 2.94                               |         |         | 2.87      |         |         | 1.88    |         |         |         |         |         |
| Glutamine                       | [mg/100 ml]   | <0,50                              |         |         | 32.2      |         |         | 10.56   |         |         |         |         |         |
| Glycine                         | [mg/100 ml]   | 2.85                               |         |         | 2.78      |         |         | 3.83    |         |         |         |         |         |
| Threonine                       | [mg/100 ml]   | 5.65                               |         |         | 5.35      |         |         | 5.65    |         |         |         |         |         |
| Arginine                        | [mg/100 ml]   | 6.13                               |         |         | 4.71      |         |         | <0,50   |         |         |         |         |         |
| Alanine                         | [mg/100 ml]   | 8.78                               |         |         | 8.36      |         |         | 11.99   |         |         |         |         |         |
| γ-Aminobutyric acid             | [mg/100 ml]   | 5.84                               |         |         | 6.05      |         |         | 2.11    |         |         |         |         |         |
| Tyrosine                        | [mg/100 ml]   | 6.79                               |         |         | 6.39      |         |         | <0,50   |         |         |         |         |         |
| Valine                          | [mg/100 ml]   | 9.18                               |         |         | 8.84      |         |         | 6.08    |         |         |         |         |         |
| Methionine                      | [mg/100 ml]   | 2.12                               |         |         | 2         |         |         | 1.6     |         |         |         |         |         |
| Tryptophan                      | [mg/100 ml]   | 2.67                               |         |         | 2.37      |         |         | 1.09    |         |         |         |         |         |
| Isoleucine                      | [mg/100 ml]   | 4.68                               |         |         | 4.34      |         |         | 3.1     |         |         |         |         |         |
| Phenylalanine                   | [mg/100 ml]   | 8.68                               |         |         | 8.12      |         |         | 5.03    |         |         |         |         |         |
| Leucine                         | [mg/100 ml]   | 9.73                               |         |         | 9.32      |         |         | 7.44    |         |         |         |         |         |
| Lysine                          | [mg/100 ml]   | 5.56                               |         |         | 5.4       |         |         | 2.62    |         |         |         |         |         |
| Amino acid content              | [mg/100 ml]   | 105.94                             |         |         | 131.36    |         |         | 85.33   |         |         |         |         |         |
| FAN                             | [mg/100 ml]   | 11.9                               |         |         | 14.7      |         |         | 9.5     |         |         |         |         |         |
| Fructose                        | [g/l]         | 1.7                                |         |         | 2.2       |         |         | 0.9     |         |         |         |         |         |
| Glucose                         | [g/l]         | 4                                  |         |         | 3         |         |         | 0.9     |         |         |         |         |         |
| Saccharose                      | [g/l]         | 2.4                                |         |         | 1.2       |         |         | 0.2     |         |         |         |         |         |
| Maltose                         | [g/l]         | 1.9                                |         |         | 0.9       |         |         | 0.3     |         |         |         |         |         |
| Maltotriose                     | [g/l]         | <0,50                              |         |         | <0,50     |         |         | <0,50   |         |         |         |         |         |
| Water                           | [%]           | 4.8                                |         |         | 4.9       |         |         | 4.9     |         |         |         |         |         |
| Extract                         | [%]           | 18.1                               |         |         | 19.6      |         |         | 11.4    |         |         |         |         |         |
| Extract (dry matter)            | [%]           | 19                                 |         |         | 20.6      |         |         | 12      |         |         |         |         |         |
| Color                           | [EBC-Units]   | 2.7                                |         |         | 2.6       |         |         | 2.6     |         |         |         |         |         |
| Soluble nitrogen                | [g/ 100 g dm] | 0.506                              |         |         | 0.553     |         |         | 0.387   |         |         |         |         |         |
| Thiobarbituric acid number      | -             | 10.6                               |         |         | 11.1      |         |         | 6.7     |         |         |         |         |         |
| Thiobarbituric acid number (10) | -             | 13.2                               |         |         | 13.9      |         |         | 8.4     |         |         |         |         |         |
| pH-value                        | -             | 6.02                               |         |         | 6.02      |         |         | 6.22    |         |         |         |         |         |
|                                 |               | Mash                               |         |         |           |         |         |         |         |         |         |         |         |
|                                 |               | K_B_R1                             | K_B_R2  | K_B_R3  | T1_B_R1   | T1_B_R2 | T1_B_R3 | T2_B_R1 | T2_B_R2 | T2_B_R3 | T3_B_R1 | T3_B_R2 | T3_B_R3 |
| Specific gravity                | -             | 1.07162                            | 1.07748 | 1.07611 | 1.06891   | 1.07249 | 1.07456 | 1.07631 | 1.07994 | 1.09271 | 1.09311 | 1.07391 | 1.07628 |
| Extract                         | [mas%]        | 17.42                              | 18.76   | 18.45   | 16.8      | 17.62   | 18.09   | 18.49   | 19.31   | 22.17   | 22.26   | 17.95   | 18.48   |
| pH-value                        | -             | 18.64                              | 20.17   | 19.81   | 17.92     | 18.86   | 19.41   | 19.86   | 20.82   | 24.18   | 24.28   | 19.23   | 19.86   |

|                            |             |        |        |        |        |        |        |        |       |        |        |       |       |
|----------------------------|-------------|--------|--------|--------|--------|--------|--------|--------|-------|--------|--------|-------|-------|
| Color                      | [EBC-units] | 6.7    | 6.6    | 6.4    | 6      | 6.3    | 6.4    | 6.9    | 7.1   | 8.3    | 7.3    | 6.4   | 6.7   |
| Soluble nitrogen           | [mg/100 ml] | 158.2  | 173.6  | 172.2  | 163.8  | 177.8  | 177.8  | 179.2  | 184.8 | 212.8  | 205.8  | 175   | 182   |
| Thiobarbituric acid number | -           | 28.8   | 30.6   | 29.8   | 27.7   | 28.6   | 29.5   | 29.5   | 30.7  | 34.9   | 32.1   | 28.8  | 30.2  |
| Aspartic acid              | [mg/100 ml] | 4.31   | 5.46   | 5.98   | 5.56   | 5.64   | 5.93   | 5.27   | 5.09  | 4.91   | 4.04   | 4.45  | 4.33  |
| Glutamic acid              | [mg/100 ml] | 5.77   | 6.54   | 7.04   | 5.86   | 5.24   | 5.59   | 5.57   | 5.53  | 5.54   | 5.43   | 4.84  | 6.06  |
| Asparagine                 | [mg/100 ml] | 7.65   | 7.4    | 8.02   | 6.95   | 6.3    | 6.68   | 6.59   | 5.98  | 6.55   | 7.52   | 6.05  | 5.36  |
| Serine                     | [mg/100 ml] | 5      | 5.74   | 6.22   | 6.06   | 4.67   | 5.07   | 5.82   | 5.56  | 5.79   | 5.03   | 5.16  | 4.68  |
| Histidine                  | [mg/100 ml] | 3.85   | 4.34   | 4.65   | 4.09   | 3.56   | 3.98   | 4.07   | 3.89  | 4.13   | 3.86   | 3.44  | 3.78  |
| Glutamine                  | [mg/100 ml] | 31.04  | 39.87  | 43.21  | 38.05  | 20.83  | 22.29  | 35.13  | 32.47 | 34.1   | 37.09  | 32.44 | 30    |
| Glycine                    | [mg/100 ml] | 2.49   | 2.93   | 3.13   | 3.03   | 1.78   | 2      | 2.95   | 2.79  | 3.08   | 2.59   | 2.69  | 2.87  |
| Threonine                  | [mg/100 ml] | 5.16   | 5.64   | 6.13   | 6.1    | 5      | 5.4    | 5.8    | 5.34  | 5.66   | 5.19   | 5.09  | 6.83  |
| Arginine                   | [mg/100 ml] | 11.47  | 12.42  | 13.59  | 12.81  | 11.09  | 11.79  | 12.14  | 11.5  | 12.28  | 11.88  | 10.92 | 6.61  |
| Alanine                    | [mg/100 ml] | 8.18   | 9.06   | 9.89   | 9.92   | 8.38   | 9.12   | 9.53   | 8.85  | 9.48   | 8.4    | 8.46  | 9.13  |
| γ-Aminobutyric acid        | [mg/100 ml] | 5.94   | 6.38   | 6.73   | 7.33   | 4.76   | 5.34   | 7.08   | 6.46  | 7.42   | 6.22   | 6.23  | 5.74  |
| Tyrosine                   | [mg/100 ml] | 7.67   | 8.29   | 9.12   | 8.6    | 8.84   | 9.36   | 8.1    | 7.51  | 8.05   | 7.87   | 7.22  | 8.03  |
| Valine                     | [mg/100 ml] | 9.24   | 9.89   | 10.91  | 10.53  | 11.28  | 11.9   | 10.06  | 9.15  | 9.72   | 9.29   | 8.84  | 9.61  |
| Methionine                 | [mg/100 ml] | 2.78   | 3.03   | 3.3    | 3.38   | 3.02   | 3.26   | 3.19   | 2.92  | 3.15   | 2.9    | 2.85  | 3.04  |
| Tryptophan                 | [mg/100 ml] | 2.48   | 3.19   | 2.78   | 2.5    | 6.01   | 5.1    | 2.51   | 2.36  | 2.69   | 2.51   | 2.59  | 2.46  |
| Isoleucine                 | [mg/100 ml] | 5.4    | 5.99   | 6.92   | 6.79   | 8.36   | 8.73   | 6.3    | 5.82  | 5.99   | 5.45   | 5.4   | 5.88  |
| Phenylalanine              | [mg/100 ml] | 10.52  | 11.81  | 13.04  | 12.16  | 14.34  | 14.85  | 11.41  | 10.72 | 11.23  | 10.56  | 10.08 | 11.2  |
| Leucine                    | [mg/100 ml] | 13.22  | 14.33  | 15.82  | 15.49  | 15.81  | 16.25  | 14.61  | 13.66 | 14.73  | 13.45  | 13.1  | 14.26 |
| Lysine                     | [mg/100 ml] | 7.99   | 9.35   | 9.55   | 9.36   | 8.77   | 9.61   | 8.74   | 8.42  | 9.13   | 7.66   | 7.96  | 8.63  |
| Amino acid content         | [mg/100 ml] | 150.11 | 171.65 | 186.07 | 174.54 | 153.67 | 162.94 | 164.89 | 154   | 163.64 | 156.95 | 147.8 | 148.5 |
| FAN                        | [mg/100 ml] | 16.8   | 19.2   | 20.8   | 19.5   | 17.2   | 18.2   | 18.4   | 17.2  | 18.3   | 17.6   | 16.5  | 16.6  |
| Fructose                   | [g/l]       | 2      | 2.1    | 2      | 2.4    | 2.4    | 2.4    | 2.8    | 2.4   | 1.8    | 2      | 2.5   | 2.2   |
| Glucose                    | [g/l]       | 13.2   | 11.8   | 13.2   | 14     | 13.6   | 13.9   | 15.4   | 14.4  | 9.9    | 11.1   | 12.9  | 11.9  |
| Saccharose                 | [g/l]       | 5      | 5.1    | 5      | 3.6    | 3.5    | 3.5    | 3.8    | 3.9   | 2.5    | 5      | 3.8   | 3.1   |
| Maltose                    | [g/l]       | 81.8   | 86.3   | 82.3   | 77     | 72.2   | 75.8   | 86     | 88.9  | 64.4   | 64.9   | 77.2  | 65.5  |
| Maltotriose                | [g/l]       | 15.6   | 14.2   | 15.1   | 14.1   | 13.6   | 14.2   | 14.7   | 14.5  | 10.5   | 14.3   | 14.7  | 14.1  |

Sweet wort

|                            |             | K_C_R1  | K_C_R2  | K_C_R3  | T1_C_R1 | T1_C_R2 | T1_C_R3 | T2_C_R1 | T2_C_R2 | T2_C_R3 | T3_C_R1 | T3_C_R2 | T3_C_R3 |
|----------------------------|-------------|---------|---------|---------|---------|---------|---------|---------|---------|---------|---------|---------|---------|
| Specific gravity           | -           | 1.03797 | 1.04036 | 1.03502 | 1.04715 | 1.04836 | 1.04364 | 1.04185 | 1.03187 | 1.03938 | 1.03775 | 1.04211 | 1.04924 |
| Extract                    | [mas%]      | 9.5     | 10.08   | 8.78    | 11.71   | 11.99   | 10.87   | 10.44   | 8.02    | 9.84    | 9.45    | 10.5    | 12.2    |
| pH-value                   | -           | 5.34    | 5.32    | 4.73    | 5.44    | 5.37    | 5.57    | 5.51    | 5.23    | 5.45    | 5.52    | 5.41    | 5.44    |
| Color                      | [EBC-units] | 4.8     | 4.8     | 3.8     | 5.9     | 6       | 6.2     | 5.3     | 3.8     | 6.6     | 5.3     | 5.3     | 6.6     |
| Soluble nitrogen           | [mg/100 ml] | 88.2    | 92.4    | 79.8    | 113.4   | 119     | 107.8   | 102.2   | 77      | 96.6    | 88.2    | 98      | 119     |
| Thiobarbituric acid number | -           | 16.9    | 18.4    | 15.9    | 20.6    | 21.5    | 19.3    | 18      | 14      | 17.1    | 17.4    | 22.5    | 21.9    |
| Aspartic acid              | [mg/100 ml] | <0,50   | 1.41    | 4.59    | 5.11    | 3.95    | <0,50   | <0,50   | <0,50   | <0,50   | <0,50   | 2.35    | 7.1     |
| Glutamic acid              | [mg/100 ml] | 9.91    | 10.66   | 5.38    | 5.66    | 4.84    | 15.74   | 14.83   | 7.12    | 19.73   | 16.71   | 5.62    | 5.18    |
| Asparagine                 | [mg/100 ml] | 6.33    | 7.37    | 7.08    | 7.63    | 6.43    | <0,50   | <0,50   | <0,50   | 0.67    | <0,50   | 7.45    | <0,50   |
| Serine                     | [mg/100 ml] | 2.9     | 1.02    | 5.11    | 5.88    | 4.94    | <0,50   | <0,50   | <0,50   | <0,50   | <0,50   | 6.12    | 4.41    |
| Histidine                  | [mg/100 ml] | 4.31    | n.d.    | 4.18    | 3.91    | 3.33    | 5.31    | 3.12    | 4.15    | n.d.    | n.d.    | 5.58    | 4.92    |
| Glutamine                  | [mg/100 ml] | 25      | 28.06   | 27.13   | 27.7    | 23.41   | 4.34    | 8.81    | <0,50   | 10.05   | <0,50   | 22.63   | <0,50   |
| Glycine                    | [mg/100 ml] | 3.21    | 3.22    | 2.61    | 3.05    | 2.66    | 3.85    | 3.5     | 3.56    | 4.57    | 3.68    | 3.41    | 3.49    |
| Threonine                  | [mg/100 ml] | 6.61    | 6.34    | 5.12    | 6.08    | 5       | 7.24    | 7.73    | 6.44    | 8.87    | 6.02    | 7.76    | 6.88    |
| Arginine                   | [mg/100 ml] | <0,50   | 11.57   | 12      | 12.04   | 11.08   | 12.35   | <0,50   | <0,50   | 1.01    | <0,50   | <0,50   | <0,50   |
| Alanine                    | [mg/100 ml] | 10.17   | 10.14   | 8.33    | 9.56    | 8.35    | 13.85   | 12.87   | 10      | 15.06   | 11.24   | 12.69   | 11.49   |

|                     |             |        |        |       |        |        |        |        |        |        |        |        |        |
|---------------------|-------------|--------|--------|-------|--------|--------|--------|--------|--------|--------|--------|--------|--------|
| γ-Aminobutyric acid | [mg/100 ml] | 5.9    | 5.9    | 5.66  | 7.12   | 6.23   | 8.42   | 8.5    | 7.25   | 10.7   | 6.47   | 7.1    | 8.14   |
| Tyrosine            | [mg/100 ml] | 8.91   | 8.76   | 8.12  | 8.55   | 7.2    | 10.6   | 10.62  | 9.02   | 11.75  | 8.76   | 11.39  | 9.98   |
| Valine              | [mg/100 ml] | 12.15  | 12.49  | 10.42 | 10.63  | 8.82   | 14.07  | 14.26  | 11.49  | 16.41  | 11.4   | 13.84  | 12.75  |
| Methionine          | [mg/100 ml] | 2.93   | 2.92   | 2.8   | 3.28   | 2.88   | 3.26   | 3.85   | 3.01   | 3.72   | 2.72   | 3.9    | 3.73   |
| Tryptophan          | [mg/100 ml] | 2.6    | 2.56   | 2.5   | 2.36   | 2.38   | 3.5    | 3.88   | 2.88   | 5.72   | 3.89   | 4.32   | 3.37   |
| Isoleucine          | [mg/100 ml] | 6.2    | 6.09   | 5.24  | 6.48   | 5.17   | 7.01   | 7.29   | 5.32   | 7.54   | 5.7    | 7.4    | 6.97   |
| Phenylalanine       | [mg/100 ml] | 11.74  | 11.48  | 10.57 | 11.35  | 9.57   | 13.82  | 13.87  | 11.33  | 15.61  | 11.11  | 15.24  | 13.41  |
| Leucine             | [mg/100 ml] | 14.31  | 14.23  | 13.51 | 14.68  | 13.19  | 17.12  | 17.8   | 14.13  | 19.31  | 13.97  | 19.24  | 17.07  |
| Lysine              | [mg/100 ml] | 9.85   | 9.67   | 8.55  | 8.26   | 7.71   | <0,50  | 10.6   | 11.49  | 14.08  | <0,50  | 12.23  | 10.83  |
| Amino acid content  | [mg/100 ml] | 143.46 | 154.16 | 148.9 | 159.11 | 137.15 | 141.02 | 142.38 | 107.48 | 165.08 | 103.24 | 168.42 | 130.61 |
| FAN                 | [mg/100 ml] | 16     | 17.2   | 16.7  | 17.8   | 15.3   | 15.8   | 15.9   | 12     | 18.5   | 11.5   | 18.8   | 14.6   |
| Fructose            | [g/l]       | 1      | 0.8    | 0.8   | 1.8    | 2.2    | 1.8    | 1.8    | 0.9    | 1.3    | 1.4    | 1.5    | 2      |
| Glucose             | [g/l]       | 6.4    | 6      | 6.5   | 8.8    | 9.9    | 9.5    | 8.9    | 6.2    | 6.5    | 7.1    | 8.4    | 9      |
| Saccharose          | [g/l]       | 2.8    | 2.6    | 2.9   | 2.1    | 2.6    | 2.2    | 2.2    | 1.7    | 2.4    | 2.3    | 2.1    | 2.5    |
| Maltose             | [g/l]       | 38.8   | 38.6   | 36.6  | 50     | 50.3   | 48     | 50.5   | 38.5   | 48.2   | 40.6   | 42.1   | 46.7   |
| Maltotriose         | [g/l]       | 8.3    | 8.5    | 8.4   | 15     | 14.7   | 15.3   | 12     | 8.4    | 11.8   | 9      | 9.55   | 11.8   |

Boiled wort

|                            |             | K_D_R1  | K_D_R2  | K_D_R3  | T1_D_R1 | T1_D_R2 | T1_D_R3 | T2_D_R1 | T2_D_R2 | T2_D_R3 | T3_D_R1 | T3_D_R2 | T3_D_R3 |
|----------------------------|-------------|---------|---------|---------|---------|---------|---------|---------|---------|---------|---------|---------|---------|
| Specific gravity           | -           | 1.04532 | 1.03235 | 1.04304 | 1.04546 | 1.04523 | 1.0541  | 1.03988 | 1.04347 | 1.03884 | 1.06014 | 1.05428 | 1.04478 |
| Extract                    | [mas%]      | 11.27   | 8.13    | 10.72   | 11.36   | 11.25   | 13.35   | 9.96    | 10.83   | 9.71    | 14.77   | 13.4    | 11.14   |
| pH-value                   | -           | 5.28    | 5.33    | 5.26    | 5.38    | 5.34    | 5.31    | 5.38    | 5.23    | 5.37    | 5.31    | 5.31    | 5.4     |
| Color                      | [EBC-units] | 6       | 4.6     | 6.1     | 6.3     | 6.3     | 7.5     | 6.3     | 6.7     | 5.5     | 8.2     | 7.9     | 6.3     |
| Soluble nitrogen           | [mg/100 ml] | 95.2    | 70      | 93.8    | 102.2   | 103.6   | 124.6   | 91      | 96.6    | 86.8    | 131.6   | 123.2   | 102.2   |
| Thiobarbituric acid number | -           | 31.8    | 25      | 28.8    | 33.6    | 32.3    | 40.1    | 24.9    | 30      | 25.4    | 40      | 37.8    | 32.7    |
| Aspartic acid              | [mg/100 ml] | 3.72    | <0,50   | 5.03    | 6.75    | 4.06    | <0,50   | <0,50   | 2.74    | 6.23    | <0,50   | 1.79    | 5       |
| Glutamic acid              | [mg/100 ml] | 4.58    | 11.93   | 5.06    | 6.5     | 3.74    | 0.8     | 8.73    | 6.87    | 6.06    | 3.5     | 5.08    | 5.32    |
| Asparagine                 | [mg/100 ml] | 9.61    | 7.5     | 9.29    | 5.15    | 6.93    | <0,50   | 5.49    | 8.13    | 10.87   | <0,50   | 8.3     | 9.33    |
| Serine                     | [mg/100 ml] | 5.92    | <0,50   | 6.03    | 5.89    | 4.87    | <0,50   | <0,50   | 3.71    | 7.7     | <0,50   | 3.92    | 6.38    |
| Histidine                  | [mg/100 ml] | 4.33    | 6       | 4.24    | 4.58    | 3.54    | n.d.    | 5.53    | 4.32    | 5.78    | n.d.    | 3.28    | 4.7     |
| Glutamine                  | [mg/100 ml] | 10.63   | 10.5    | 9.35    | 10.73   | 8.76    | 3.39    | 7.44    | 5.72    | 12.21   | <0,50   | 7.13    | 11.61   |
| Glycine                    | [mg/100 ml] | 3.23    | 4.61    | 3.02    | 3.52    | 2.41    | 6.2     | 4.26    | 3.91    | 3.92    | 2.25    | 2.75    | 3.43    |
| Threonine                  | [mg/100 ml] | 5.87    | 9.27    | 5.69    | 9.4     | 4.89    | <0,50   | 8.49    | 6.75    | 7.93    | 5.12    | 5.26    | 7.97    |
| Arginine                   | [mg/100 ml] | 10.48   | 2.44    | 11.64   | <0,50   | 10.02   | <0,50   | <0,50   | 10.36   | 14.93   | <0,50   | 11.16   | 9.18    |
| Alanine                    | [mg/100 ml] | 10.38   | 14.64   | 9.98    | 11.22   | 8.24    | 10.89   | 13.63   | 11.69   | 13.41   | 7.91    | 8.9     | 11.66   |
| γ-Aminobutyric acid        | [mg/100 ml] | 6.74    | 9.42    | 6.45    | 7.94    | 5.8     | 10.72   | 9.09    | 7.07    | 9.97    | 6.36    | 6.78    | 7.89    |
| Tyrosine                   | [mg/100 ml] | 7.85    | 12.39   | 7.91    | 10      | 7.08    | 8.93    | 10.84   | 8.94    | 11.67   | 7.13    | 7.5     | 9.32    |
| Valine                     | [mg/100 ml] | 11.41   | 16.65   | 11.32   | 12.25   | 9.52    | 12.18   | 14.72   | 12.86   | 15.24   | 9.45    | 9.5     | 12.9    |
| Methionine                 | [mg/100 ml] | 2.93    | 3.69    | 3       | 3.72    | 2.67    | 2.5     | 3.59    | 3.24    | 4.28    | 2.21    | 3.01    | 3.65    |
| Tryptophan                 | [mg/100 ml] | 3       | 5.16    | 3       | 3.47    | 2.64    | 4.62    | 4.31    | 3.17    | 4.67    | 2.86    | 1.93    | 3.44    |
| Isoleucine                 | [mg/100 ml] | 5.74    | 7.91    | 5.7     | 7.22    | 5.15    | 6.68    | 7.65    | 6.06    | 8.37    | 4.29    | 4.94    | 6.74    |
| Phenylalanine              | [mg/100 ml] | 11.12   | 17.01   | 11.02   | 13.13   | 9.74    | 13.15   | 15.64   | 11.62   | 16.01   | 9.29    | 9.14    | 12.7    |
| Leucine                    | [mg/100 ml] | 13.94   | 19.81   | 14.15   | 16.84   | 12.36   | 15.9    | 20.09   | 15.12   | 19.99   | 13.08   | 13.63   | 16.62   |
| Lysine                     | [mg/100 ml] | 8.29    | 7.69    | 8.44    | 9.71    | 7.51    | <0,50   | 14.79   | 1.51    | 7.07    | 8.42    | 6.88    | 2.67    |
| Amino acid content         | [mg/100 ml] | 139.75  | 166.92  | 140.32  | 148.34  | 119.96  | 97.04   | 154.92  | 133.8   | 186.3   | 82.84   | 121     | 150.51  |
| FAN                        | [mg/100 ml] | 15.6    | 18.7    | 15.7    | 16.6    | 13.4    | 10.9    | 17.3    | 15      | 20.8    | 9.3     | 13.5    | 16.8    |
| Fructose                   | [g/l]       | 1.2     | 2.5     | 2.6     | 2.9     | 2.9     | 2.2     | 2.6     | 2.7     | 2.7     | 2.6     | 2.6     | 2.6     |
| Glucose                    | [g/l]       | 8.8     | 8.4     | 8.3     | 8.6     | 9.1     | 7.1     | 8.9     | 8       | 8.7     | 7.1     | 6.9     | 8.4     |

|             |       |     |      |      |      |      |      |      |      |      |      |      |      |
|-------------|-------|-----|------|------|------|------|------|------|------|------|------|------|------|
| Saccharose  | [g/l] | 3.5 | 2.9  | 3.2  | 2.9  | 3    | 2.3  | 2.8  | 2.9  | 2.7  | 2.3  | 2.4  | 2.7  |
| Maltose     | [g/l] | 51  | 50.2 | 53.7 | 60.4 | 51.4 | 34.6 | 53.1 | 54.3 | 52.8 | 34.8 | 37.4 | 57.5 |
| Maltotriose | [g/l] | 11  | 11.8 | 15   | 15.2 | 15.4 | 10.7 | 14.6 | 15   | 14.7 | 10.8 | 10.3 | 15.3 |

Cooled wort

|                            |             | K_E_R1  | K_E_R2  | K_E_R3  | T1_E_R1 | T1_E_R2 | T1_E_R3 | T2_E_R1 | T2_E_R2 | T2_E_R3 | T3_E_R1 | T3_E_R2 | T3_E_R3 |
|----------------------------|-------------|---------|---------|---------|---------|---------|---------|---------|---------|---------|---------|---------|---------|
| Specific gravity           | -           | 1.04289 | 1.04051 | 1.04309 | 1.04256 | 1.04332 | 1.04766 | 1.04396 | 1.04494 | 1.0442  | 1.04747 | 1.04383 | 1.04296 |
| Extract                    | [mas%]      | 10.69   | 10.12   | 10.73   | 10.61   | 10.79   | 11.83   | 10.94   | 11.18   | 11      | 11.78   | 10.91   | 10.7    |
| pH-value                   | -           | 5.21    | 5.21    | 5.2     | 5.29    | 5.27    | 5.26    | 5.27    | 5.25    | 5.26    | 5.28    | 5.29    | 5.29    |
| Color                      | [EBC-units] | 6.9     | 6.9     | 6.8     | 8       | 7.8     | 8.2     | 7.9     | 8       | 8.3     | 7.9     | 7.4     | 7.9     |
| Soluble nitrogen           | [mg/100 ml] | 91      | 86.8    | 92.4    | 93.8    | 98      | 106.4   | 98      | 98      | 98      | 102.2   | 98      | 96.6    |
| Thiobarbituric acid number | -           | 35.7    | 37.2    | 35.9    | 39.8    | 41      | 43.5    | 38.7    | 43.9    | 42.9    | 41.2    | 37.7    | 37.1    |
| Aspartic acid              | [mg/100 ml] | 4.98    | 1.27    | 1.28    | 4.19    | 3.26    | 1.32    | 6.48    | 4.27    | 4.58    | 2.29    | 0.6     | 3.95    |
| Glutamic acid              | [mg/100 ml] | 5.71    | 8.23    | 3.15    | 4.43    | 4.3     | 2.01    | 4.89    | 3.61    | 4.75    | 6.29    | 5.35    | 4.72    |
| Asparagine                 | [mg/100 ml] | 9.66    | 8.42    | 8.93    | 9.06    | 9.67    | 6.09    | 9.08    | 8.38    | 10.39   | 7.71    | 8.43    | 8.19    |
| Serine                     | [mg/100 ml] | 5.55    | 1.76    | 5.09    | 6.88    | 5.32    | 3.81    | 6.72    | 6.1     | 7.73    | 4.48    | 6.91    | 5.86    |
| Histidine                  | [mg/100 ml] | 4.87    | n.d.    | 4.95    | 4.81    | 3.62    | 3.18    | 5.01    | 3.85    | 5.14    | 4.59    | 4.93    | 5.11    |
| Glutamine                  | [mg/100 ml] | 7.56    | 2.09    | 7.57    | 2.8     | 3.64    | 2.83    | 3.89    | 2.17    | 3.18    | 3.6     | 2.02    | 4.15    |
| Glycine                    | [mg/100 ml] | 2.72    | 3.02    | 2.69    | 3.56    | 2.93    | 2.03    | 3.39    | 3.24    | 4.65    | 3.16    | 4.01    | 3.31    |
| Threonine                  | [mg/100 ml] | 6.11    | 7.22    | 7.78    | 6.05    | 5.37    | 4.15    | 6.79    | 5.19    | 8.78    | 7.04    | 7.94    | 8.01    |
| Arginine                   | [mg/100 ml] | 12.26   | 3.77    | 2.25    | 13.03   | 11.67   | 6.15    | 12.83   | 10.45   | 6.25    | 7.77    | 1.15    | 3.4     |
| Alanine                    | [mg/100 ml] | 9       | 11.45   | 9.41    | 11.36   | 9.11    | 6.83    | 11.56   | 10.24   | 14.17   | 9.89    | 13.35   | 10.87   |
| γ-Aminobutyric acid        | [mg/100 ml] | 6.35    | 7.42    | 5.07    | 8.41    | 7.08    | 4.2     | 8.11    | 7.42    | 9.48    | 6.9     | 8.48    | 7.8     |
| Tyrosine                   | [mg/100 ml] | 9.37    | 9.74    | 9.7     | 8.57    | 7.67    | 6.28    | 9.73    | 7       | 8.95    | 8.36    | 8.97    | 10.1    |
| Valine                     | [mg/100 ml] | 11.36   | 12.47   | 11.47   | 10.5    | 9.67    | 7.83    | 13.01   | 10.07   | 13.59   | 9.81    | 11.66   | 12.51   |
| Methionine                 | [mg/100 ml] | 2.85    | 2.86    | 3.05    | 3.17    | 3       | 2.11    | 3.53    | 2.81    | 3.72    | 2.9     | 3.33    | 3.53    |
| Tryptophan                 | [mg/100 ml] | 3.74    | 5.15    | 3.74    | 3       | 2.38    | 2       | 3.57    | 2.49    | 3.43    | 3.08    | 2.62    | 3.73    |
| Isoleucine                 | [mg/100 ml] | 6.14    | 7.95    | 5.91    | 5.85    | 5.01    | 3.91    | 6.95    | 5.09    | 7.01    | 5.24    | 5.42    | 6.81    |
| Phenylalanine              | [mg/100 ml] | 12.53   | 16.24   | 12.67   | 11.18   | 9.46    | 7.73    | 13.16   | 9.47    | 13.19   | 10.98   | 10.84   | 13.29   |
| Leucine                    | [mg/100 ml] | 14.62   | 18.38   | 15.01   | 16.24   | 14.29   | 10.44   | 16.81   | 13.55   | 17.82   | 14.77   | 17.39   | 16.83   |
| Lysine                     | [mg/100 ml] | 9.58    | 12.77   | 9.98    | 9.79    | 7.7     | 6.52    | 10      | 8.28    | 10.63   | 8.78    | 8.82    | 10.45   |
| Amino acid content         | [mg/100 ml] | 144.93  | 140.56  | 129.68  | 142.83  | 125.14  | 89.43   | 155.51  | 123.69  | 157.44  | 127.62  | 132.21  | 142.61  |
| FAN                        | [mg/100 ml] | 16.2    | 15.7    | 14.5    | 16      | 14      | 10      | 17.4    | 13.8    | 17.6    | 14.3    | 14.8    | 16      |
| Fructose                   | [g/l]       | 1.5     | 1.2     | 1.4     | 1.2     | 0.6     | 1.2     | 2.8     | 1.4     | 1.1     | 1.8     | 1.2     | 1.7     |
| Glucose                    | [g/l]       | 8.8     | 7.5     | 8.3     | 6.5     | 4       | 5.6     | 9.2     | 7.6     | 6.2     | 9.1     | 5.7     | 8.3     |
| Saccharose                 | [g/l]       | 3.2     | 3       | 3.2     | 1.8     | 1       | 1.4     | 2.9     | 2.2     | 1.7     | 2.5     | 1.7     | 2.3     |
| Maltose                    | [g/l]       | 54.5    | 54.4    | 53.4    | 41.3    | 20.9    | 27      | 55.7    | 49.6    | 44.6    | 55.5    | 29.7    | 51      |
| Maltotriose                | [g/l]       | 11.7    | 10.6    | 11.4    | 8.3     | 5       | 6.6     | 14.9    | 10.3    | 10      | 12.7    | 6.5     | 13.1    |

Mature beer and forced aged beer

|                  |            | B_K_t0  | B_T_t0_R1 | B_T_t0_R2 | B_T_t0_R3 | B_K_fo | B_T_fo_R1 | B_T_fo_R2 | B_T_fo_R3 |
|------------------|------------|---------|-----------|-----------|-----------|--------|-----------|-----------|-----------|
| Original gravity | [mas%]     | 11.86   | 11.81     | 11.88     | 11.97     |        |           |           |           |
| Original gravity | [mas/vol%] | 12.41   | 12.35     | 12.42     | 12.52     |        |           |           |           |
| Alcohol content  | [mas%]     | 3.93    | 3.9       | 3.91      | 3.93      |        |           |           |           |
| Alcohol content  | [vol%]     | 5.01    | 4.98      | 5         | 5.02      |        |           |           |           |
| Apparent extract | [mas%]     | 2.43    | 2.44      | 2.48      | 2.53      |        |           |           |           |
| Apparent extract | [mas/vol%] | 2.45    | 2.46      | 2.5       | 2.55      |        |           |           |           |
| Specific gravity | -          | 1.00949 | 1.00952   | 1.00966   | 1.00989   |        |           |           |           |
| Real extract     | [mas%]     | 4.25    | 4.24      | 4.29      | 4.35      |        |           |           |           |

|                                   |            |       |       |       |       |                  |      |                  |                  |
|-----------------------------------|------------|-------|-------|-------|-------|------------------|------|------------------|------------------|
| Real extract                      | [mas/vol%] | 4.31  | 4.31  | 4.35  | 4.42  |                  |      |                  |                  |
| Apparent attenuation              | [%]        | 80.3  | 80.1  | 79.9  | 79.6  |                  |      |                  |                  |
| Real attenuation                  | [%]        | 64.2  | 64.1  | 63.9  | 63.6  |                  |      |                  |                  |
| pH-value                          | -          | 4.55  | 4.53  | 4.53  | 4.55  |                  |      |                  |                  |
| DLG score (odor)                  | -          | 4.4   | 4.3   | 4.4   | 4.3   | 3.4              | 3.8  | 3.2              | 3.4              |
| DLG taste/aroma                   | -          | -     | -     | -     | -     | aged, sherrylike | aged | aged, sherrylike | aged, sherrylike |
| DLG score (taste)                 | -          | 4.4   | 4.3   | 4.4   | 4.3   | 3.4              | 3.8  | 3.2              | 3.4              |
| DLG off taste/aroma               | -          | -     | -     | -     | -     | aged, sherrylike | aged | aged, sherrylike | aged, sherrylike |
| DLG score (palate fullness)       | -          | 4.6   | 4.6   | 4.6   | 4.6   | 4.6              | 4.6  | 4.6              | 4.4              |
| DLG score (effervescence)         | -          | 4.6   | 4.6   | 4.6   | 4.6   | 4.6              | 4.6  | 4.6              | 4.6              |
| DLG score (quality of bitterness) | -          | 4.2   | 4.0   | 4.3   | 4.2   | 3.2              | 3.6  | 3.6              | 3.5              |
| DLG (flavor stability)            | -          | -     | -     | -     | -     | 0.75             | 0.35 | 0.78             | 0.61             |
| DLG score (overall)               | -          | 4.40  | 4.30  | 4.43  | 4.30  | 3.65             | 3.95 | 3.65             | 3.70             |
| 2-Methylbutanal (O/A)             | [µg/l]     | <5    | <5    | <5    | <5    | 8                | 7    | <5               | <5               |
| 3-Methylbutanal (O/A)             | [µg/l]     | 14    | 18    | 15    | 10    | 26               | 23   | 14               | 13               |
| 2-Furfural (H/A)                  | [µg/l]     | <5    | <5    | <5    | <5    | 95               | 79   | 70               | 67               |
| 5-Methylfurfural (A)              | [µg/l]     | <5    | <5    | <5    | <5    | <5               | <5   | <5               | <5               |
| Benzaldehyde (O,A)                | [µg/l]     | <5    | <5    | <5    | <5    | <5               | <5   | <5               | <5               |
| 2-Phenylethanal (O,A)             | [µg/l]     | 11    | 16    | 11    | <5    | 25               | 23   | 11               | 6                |
| Diethylsuccinate (A)              | [µg/l]     | <5    | <5    | <5    | <5    | <5               | <5   | <5               | <5               |
| Ethyl nicotinate (H/A)            | [µg/l]     | <5    | <5    | <5    | <5    | 9                | 8    | 8                | 8                |
| Ethyl phenylacetat (A)            | [µg/l]     | <5    | <5    | <5    | <5    | <5               | <5   | <5               | <5               |
| 2-Acetylfuran (A)                 | [µg/l]     | 11    | 11    | 10    | 11    | 11               | 11   | 12               | 11               |
| 2-Propionyl-furan (A)             | [µg/l]     | 7     | 7     | 6     | 7     | 7                | 7    | 7                | 7                |
| γ-Nonalacton (H/A)                | [µg/l]     | 22    | 21    | 19    | 18    | 29               | 26   | 24               | 26               |
| Sum of heat indicators (H)        | [µg/l]     | 22    | 21    | 19    | 18    | 133              | 112  | 102              | 100              |
| Sum of oxygen indicators (O)      | [µg/l]     | 25    | 34    | 26    | 10    | 59               | 52   | 24               | 19               |
| Sum of aging indicators (A)       | [µg/l]     | 64    | 71    | 60    | 46    | 210              | 181  | 145              | 135              |
| Ethyl butyrate                    | [mg/l]     | 0.07  | 0.05  | 0.06  | 0.06  |                  |      |                  |                  |
| Isobutyl acetate                  | [mg/l]     | 0.04  | 0.03  | 0.04  | 0.04  |                  |      |                  |                  |
| Phenylethyl acetate               | [mg/l]     | 0.37  | 0.31  | 0.34  | 0.29  |                  |      |                  |                  |
| Ethyl hexanoate                   | [mg/l]     | 0.12  | 0.1   | 0.1   | 0.1   |                  |      |                  |                  |
| Ethyl octanoate                   | [mg/l]     | 0.22  | 0.19  | 0.19  | 0.19  |                  |      |                  |                  |
| Ethyl caprate                     | [mg/l]     | 0.08  | 0.06  | 0.07  | 0.07  |                  |      |                  |                  |
| Isovaleric acid                   | [mg/l]     | 1.53  | 1.55  | 1.67  | 1.61  |                  |      |                  |                  |
| Caproic acid                      | [mg/l]     | 1.92  | 1.51  | 1.58  | 1.67  |                  |      |                  |                  |
| Caprylic acid                     | [mg/l]     | 2.66  | 2.11  | 1.99  | 2.41  |                  |      |                  |                  |
| Capric acid                       | [mg/l]     | 0.44  | 0.34  | 0.32  | 0.4   |                  |      |                  |                  |
| Acetaldehyde                      | [mg/l]     | 10    | 9.8   | 10.7  | 9.7   |                  |      |                  |                  |
| Ethylacetate                      | [mg/l]     | 11.4  | 12    | 12    | 10.7  |                  |      |                  |                  |
| Propyl alcohol                    | [mg/l]     | 9.6   | 10.7  | 10    | 9.9   |                  |      |                  |                  |
| 2-Methylpropanol                  | [mg/l]     | 10.3  | 11.4  | 10.7  | 10.7  |                  |      |                  |                  |
| Isoamyl acetate                   | [mg/l]     | 1     | 1     | 1.1   | 0.9   |                  |      |                  |                  |
| Amyl alcohols                     | [mg/l]     | 66.9  | 68.2  | 67.5  | 65.3  |                  |      |                  |                  |
| Butan-2,3-dione (Diacetyl)        | [mg/l]     | 0.02  | 0.02  | 0.02  | 0.02  |                  |      |                  |                  |
| Pentan-2,3-dione                  | [mg/l]     | <0,01 | <0,01 | <0,01 | <0,01 |                  |      |                  |                  |
| Acetoin                           | [mg/l]     | 4     | 4.9   | 4.2   | 4.4   |                  |      |                  |                  |
| Dimethylsulfide                   | [µg/l]     | 66    | 75    | 70    | 76    |                  |      |                  |                  |

|                            |             |       |        |        |       |
|----------------------------|-------------|-------|--------|--------|-------|
| 2-Phenylethanol            | [mg/l]      | 21.9  | 18     | 18.1   | 15.4  |
| SO <sub>2</sub>            | [mg/l]      | 3     | 3      | 3      | 3     |
| Color                      | [EBC-units] | 5.2   | 5.2    | 5.2    | 5.2   |
| Fructose                   | [g/l]       | 0.1   | 0.3    | 0.1    | 0.3   |
| Glucose                    | [g/l]       | 0.3   | 0.4    | 0.2    | 0.4   |
| Saccharose                 | [g/l]       | <0,10 | <0,10  | <0,10  | <0,10 |
| Maltose                    | [g/l]       | 1     | 1.2    | 1      | 0.9   |
| Maltotriose                | [g/l]       | 2.4   | 1.6    | 2.6    | 2     |
| Aspartic acid              | [mg/100 ml] | 5.21  | 5.46   | 5.32   | 5.93  |
| Glutamic acid              | [mg/100 ml] | 5.67  | 5.26   | 5.07   | 5.81  |
| Asparagine                 | [mg/100 ml] | 3.65  | 3.83   | 3.57   | 4.39  |
| Serine                     | [mg/100 ml] | 1.34  | 1.6    | 1.45   | 1.67  |
| Histidine                  | [mg/100 ml] | 4.71  | 4.75   | 4.72   | 4.82  |
| Glutamine                  | [mg/100 ml] | 4.62  | 4.55   | 4.48   | 3.76  |
| Glycine                    | [mg/100 ml] | 4.84  | 4.65   | 5.17   | 5.02  |
| Threonine                  | [mg/100 ml] | 1.38  | 1.53   | 1.47   | 1.69  |
| Arginine                   | [mg/100 ml] | 11.78 | 12.43  | 12.39  | 11.8  |
| Alanine                    | [mg/100 ml] | 15.25 | 14.5   | 14.78  | 14.92 |
| γ-Aminobutyric acid        | [mg/100 ml] | 11.3  | 12.31  | 12.19  | 11.41 |
| Tyrosine                   | [mg/100 ml] | 9.59  | 11.14  | 10.05  | 10.04 |
| Valine                     | [mg/100 ml] | 10.28 | 11.63  | 11.23  | 11.39 |
| Methionine                 | [mg/100 ml] | 1.29  | 1.6    | 1.49   | 1.61  |
| Tryptophan                 | [mg/100 ml] | 3.37  | 3.22   | 3.37   | 3.24  |
| Isoleucine                 | [mg/100 ml] | 3.88  | 4.78   | 4.56   | 4.72  |
| Phenylalanine              | [mg/100 ml] | 10.47 | 12.13  | 11.33  | 11.76 |
| Leucine                    | [mg/100 ml] | 6.28  | 7.69   | 7.39   | 7.94  |
| Lysine                     | [mg/100 ml] | 4.09  | 4.78   | 4.74   | 5     |
| Amino acid content         | [mg/100 ml] | 119   | 127.83 | 124.77 | 126.9 |
| FAN                        | [mg/100 ml] | 146.4 | 157.2  | 153.5  | 156.1 |
| Soluble nitrogen           | [mg/100 ml] | 83    | 86.1   | 85.4   | 85.8  |
| Thiobarbituric acid number | -           | 34.1  | 34.3   | 33.8   | 35.2  |

Aging experiment

|                                   |        | B_K_t1 | B_T_t1_R1 | B_T_t1_R2 | B_T_t1_R3 | B_K_t2 | B_T_t2_R1                                  | B_T_t2_R2     | B_T_t2_R3 | B_K_t3          | B_T_t3_R1 | B_T_t3_R2       | B_T_t3_R3 |
|-----------------------------------|--------|--------|-----------|-----------|-----------|--------|--------------------------------------------|---------------|-----------|-----------------|-----------|-----------------|-----------|
| DLG score (odor)                  | -      | 4.2    | 4.2       | 4.3       | 4.3       | 4.1    | 4.0                                        | 3.5           | 3.8       | 3.2             | 3.8       | 3.6             | 4.0       |
| DLG taste/aroma                   | -      | -      | -         | -         | -         | -      | slightly aged, traces of spent grain aroma | aged, carbord | aged      | aged, breadlike | aged      | aged, breadlike | -         |
| DLG score (taste)                 | -      | 4.2    | 4.2       | 4.2       | 4.3       | 4.1    | 4.0                                        | 3.5           | 3.8       | 3.4             | 3.9       | 3.6             | 4.0       |
| DLG off taste/aroma               | -      | -      | -         | -         | -         | -      | slightly aged, traces of spent grain aroma | aged, carbord | aged      | aged, breadlike | aged      | aged, breadlike | -         |
| DLG score (palate fullness)       | -      | 4.6    | 4.6       | 4.6       | 4.6       | 4.6    | 4.6                                        | 4.6           | 4.6       | 4.5             | 4.5       | 4.5             | 4.5       |
| DLG score (effervescence)         | -      | 4.6    | 4.6       | 4.6       | 4.6       | 4.6    | 4.6                                        | 4.6           | 4.6       | 4.5             | 4.5       | 4.5             | 4.5       |
| DLG score (quality of bitterness) | -      | 4.3    | 4.2       | 4.3       | 4.3       | 3.9    | 3.7                                        | 3.5           | 3.7       | 3.8             | 3.9       | 3.8             | 3.8       |
| DLG score (overall)               | -      | 4.33   | 4.30      | 4.35      | 4.38      | 4.18   | 4.08                                       | 3.78          | 3.98      | 3.73            | 4.03      | 3.88            | 4.08      |
| 2-Methylbutanal (O/A)             | [µg/l] | <5     | <5        | <5        | <5        | 13     | 16                                         | 13            | 14        | <5              | 6         | <5              | <5        |
| 3-Methylbutanal (O/A)             | [µg/l] | 13     | 11        | 9         | 6         | 13     | 17                                         | 15            | 14        | 17              | 19        | 18              | 11        |
| 2-Furfural (H/A)                  | [µg/l] | <5     | 9         | <5        | <5        | 5      | 6                                          | 8             | <5        | 237             | 236       | 234             | 237       |



|                              |        |      |      |      |      |       |      |      |      |      |      |      |      |
|------------------------------|--------|------|------|------|------|-------|------|------|------|------|------|------|------|
| 5-Methylfurfural (A)         | [µg/l] | <5   | <5   | <5   | <5   | <5    | <5   | <5   | <5   | 102  | 112  | 100  | 104  |
| Benzaldehyde (O,A)           | [µg/l] | <5   | <5   | <5   | <5   | <5    | <5   | <5   | <5   | 87   | 81   | 84   | 83   |
| 2-Phenylethanal (O,A)        | [µg/l] | 10   | 5    | <5   | <5   | 6     | 5    | 12   | <5   | <5   | <5   | <5   | <5   |
| Diethylsuccinate (A)         | [µg/l] | <5   | <5   | <5   | <5   | <5    | <5   | <5   | <5   | <5   | <5   | <5   | <5   |
| Ethyl nicotinate (H/A)       | [µg/l] | <5   | <5   | <5   | <5   | <5    | <5   | <5   | <5   | <5   | <5   | <5   | <5   |
| Ethyl phenylacetat (A)       | [µg/l] | <5   | <5   | <5   | <5   | <5    | <5   | <5   | <5   | <5   | <5   | <5   | <5   |
| 2-Acetylfuran (A)            | [µg/l] | 9    | 9    | 9    | 10   | 9     | 9    | 8    | 9    | 9    | 8    | 9    | 9    |
| 2-Propionyl-furan (A)        | [µg/l] | 6    | 5    | 6    | 6    | 5     | 6    | 5    | 6    | 5    | 5    | 5    | 5    |
| γ-Nonalacton (H/A)           | [µg/l] | 16   | 17   | 17   | 17   | 24    | 23   | 26   | 34   | 26   | 28   | 27   | 25   |
| Sum of heat indicators (H)   | [µg/l] | 16   | 26   | 17   | 17   | 29    | 29   | 33   | 34   | 263  | 264  | 261  | 262  |
| Sum of oxygen indicators (O) | [µg/l] | 23   | 16   | 9    | 6    | 31    | 38   | 40   | 28   | 104  | 105  | 103  | 94   |
| Sum of aging indicators (A)  | [µg/l] | 54   | 55   | 41   | 39   | 74    | 81   | 87   | 77   | 483  | 494  | 477  | 475  |
| Ethyl butyrate               | [mg/l] | 0.06 | 0.06 | 0.06 | 0.07 | 0.06  | 0.05 | 0.06 | 0.06 | 0.05 | 0.06 | 0.06 | 0.06 |
| Isobutyl acetate             | [mg/l] | n.d. | n.d. | n.d. | n.d. | 0.03  | 0.03 | 0.03 | 0.03 | 0.03 | 0.03 | 0.03 | 0.02 |
| Phenylethyl acetate          | [mg/l] | 0.32 | 0.26 | 0.29 | 0.25 | 0.37  | 0.28 | 0.32 | 0.28 | 0.06 | 0.27 | 0.31 | 0.26 |
| Ethyl hexanoate              | [mg/l] | 0.1  | 0.08 | 0.08 | 0.09 | 0.11  | 0.09 | 0.09 | 0.09 | 0.1  | 0.09 | 0.09 | 0.09 |
| Ethyl octanoate              | [mg/l] | 0.21 | 0.18 | 0.18 | 0.2  | 0.23  | 0.2  | 0.18 | 0.18 | 0.21 | 0.11 | 0.19 | 0.18 |
| Ethyl caprate                | [mg/l] | 0.06 | 0.05 | 0.06 | 0.05 | 0.01  | 0.01 | 0.03 | 0.03 | 0.04 | 0.05 | 0.07 | 0.03 |
| Isovaleric acid              | [mg/l] | 1.12 | 1.16 | 1.1  | 1.25 | 1.07  | 1.03 | 1.12 | 1.02 | 1.07 | 0.97 | 0.91 | 1.01 |
| Caproic acid                 | [mg/l] | 1.94 | 1.37 | 1.49 | 1.61 | 2.41  | 1.81 | 1.85 | 1.88 | 2.37 | 2.21 | 1.92 | 1.99 |
| Caprylic acid                | [mg/l] | 3.21 | 2.48 | 2.67 | 2.69 | 3.41  | 3.41 | 2.56 | 2.74 | 2.75 | 2.07 | 2.77 | 2.77 |
| Capric acid                  | [mg/l] | 0.27 | 0.17 | 0.22 | 0.2  | 0.43  | 0.39 | 0.32 | 0.3  | 0.39 | 0.44 | 0.41 | 0.41 |
| Acetaldehyde                 | [mg/l] | 10.2 | 8.9  | 9.7  | 9.1  | 8.9   | 8.3  | 9.3  | 9.1  | 9.4  | 9.3  | 10.3 | 9.9  |
| Ethylacetate                 | [mg/l] | 12.2 | 12.1 | 12.4 | 11.1 | 11.2  | 10.6 | 11.4 | 10.6 | 11.6 | 11.7 | 12.3 | 11.7 |
| Propyl alcohol               | [mg/l] | 9.5  | 10.6 | 10   | 10.1 | 9     | 10   | 9.5  | 9.6  | 9.5  | 10.6 | 10.2 | 10.4 |
| 2-Methylpropanol             | [mg/l] | 10.7 | 11.4 | 10.8 | 10.9 | 9.8   | 10.3 | 10.3 | 10.2 | 10.3 | 11   | 11   | 11.2 |
| Isoamyl acetate              | [mg/l] | 1.1  | 1    | 1.1  | 0.9  | 1     | 0.9  | 1    | 0.9  | 1    | 0.9  | 1.1  | 1    |
| Amyl alcohols                | [mg/l] | 69.3 | 70.4 | 68.8 | 66.6 | 64.3  | 63.5 | 64.8 | 62.4 | 66.8 | 68.2 | 68.9 | 68.3 |
| Butan-2,3-dione (Diacetyl)   | [mg/l] | 0.05 | 0.05 | 0.04 | 0.05 | 0.04  | 0.06 | 0.05 | 0.07 | 0.06 | 0.1  | 0.07 | 0.08 |
| Pentan-2,3-dione             | [mg/l] | 0.01 | 0.01 | 0.01 | 0.01 | <0,01 | 0.02 | 0.01 | 0.02 | 0.02 | 0.03 | 0.02 | 0.02 |
| Acetoin                      | [mg/l] | 4.4  | 5.4  | 4.6  | 5    | 2.9   | 3.4  | 3    | 3.2  | 3.1  | 3.6  | 3.2  | 3.4  |
| Dimethylsulfide              | [µg/l] | 40   | 43   | 40   | 47   | 68    | 72   | 71   | 73   | 58   | 66   | 63   | 65   |
| 2-Phenylethanol              | [mg/l] | 19.2 | 17.1 | 17   | 17   | 22.9  | 17.4 | 19.7 | 16.5 | 18.1 | 17.8 | 18.3 | 18.3 |

**Supplementary Table S3.** Parameters for UPLC-separation and ToF-measurements.

| Parameter                                | Value                                                                                                                                                                                                                                |
|------------------------------------------|--------------------------------------------------------------------------------------------------------------------------------------------------------------------------------------------------------------------------------------|
| SPE sample preparation                   | doi.org/10.3389/fchem.2021.715372                                                                                                                                                                                                    |
| column                                   | RP (C18: 1.7 $\mu\text{m}$ , 2.1 x 100 mm, Acquity™ UPLC BEH™)                                                                                                                                                                       |
| flow rate                                | 400 $\mu\text{L min}^{-1}$                                                                                                                                                                                                           |
| column temperature                       | 40 °C                                                                                                                                                                                                                                |
| injection volume                         | 5 $\mu\text{L}$                                                                                                                                                                                                                      |
| gradient profile                         | 95 % A (0.1 % formic acid in water) and 5 % B (0.1 % formic acid in acetonitrile) for 1.2 min; decreasing to 50 % A in 2.5 min; decreasing to 0.5 % A in 7.8 min; held for 3.5 min; equilibrated in starting conditions for 3.5 min. |
| measurement time                         | 18.5 min.                                                                                                                                                                                                                            |
| external calibration                     | ESI negative calibration solution (SCIEX X500B System)                                                                                                                                                                               |
| ESI ionization mode                      | negative                                                                                                                                                                                                                             |
| Ion source gas                           | 45 psi                                                                                                                                                                                                                               |
| Curtain gas                              | 45 psi                                                                                                                                                                                                                               |
| interface temperature                    | 500°C                                                                                                                                                                                                                                |
| MS <sup>1</sup> parameters               | 0.496 sec <sup>-1</sup> event cycle time<br>50-1500 Da mass range<br>Accumulation time 0.2 sec                                                                                                                                       |
| MS <sup>2</sup> fragmentation parameters | DDA (8 dependent events)<br>Accumulation time 0.03 sec<br>Time bins to sum 4<br>CE spread 30 eV $\pm$ 15 eV                                                                                                                          |

**Supplementary Table S4.** Parameters of the UHPLC-ToF-MS data processing using the mzMine3 software.

| Parameter                        | value                                                                       |
|----------------------------------|-----------------------------------------------------------------------------|
| MS1   MS2 noise level            | 800   50                                                                    |
| Minimum peak height              | 1800                                                                        |
| Minimum peak width               | 5 scans                                                                     |
| m/z tolerance                    | 0.005 Da or 10 ppm                                                          |
| Smoothing                        | Savitzky Golay (7)                                                          |
| Local minimum resolution         | chrom. threshold 0.9<br>Min ratio peak top / edge 2.0                       |
| <sup>13</sup> C isotope filter   | applied                                                                     |
| Peak alignment                   | 0.005 Da or 10 ppm<br>9 sec. RT tolerance<br>m/z weight 3   RT weight 2     |
| MFG export (SIRIUS): MS/MS merge | 0.01 Da or 20 ppm<br>Cosine threshold 0.65 %<br>Signal count threshold 33 % |

**Supplementary Table S5.** SIRIUS data processing and interpretation parameters.

| <b>Parameter</b>                        | <b>value</b>                                                                                                                                     |
|-----------------------------------------|--------------------------------------------------------------------------------------------------------------------------------------------------|
| SIRIUS Molecular formula identification | $C_{\infty}H_{\infty}N_{\infty}O_{\infty}S_3P_3$<br>Mass accuracy 5 ppm                                                                          |
| CSI:FingerID Fingerprint Prediction     | [M-H] <sup>-</sup> [M+Cl] <sup>-</sup> [M+Br] <sup>-</sup><br>Bio Database, Biocyc, CHEBI,<br>COONUT, EcoCyc Mine, GNPS,                         |
| CSI:FingerID Structure Database Search  | HMDB, HSDB, KEGG, KEGG Mine,<br>KNAPSAcK, Maconda, MESH,<br>NORMAN, Natural Products, Plantcyc,<br>PubChem, PubMed, YMDB, YMDB<br>Mine, ZINC bio |
| CANOPUS Compound Class Prediction       | Subclass level                                                                                                                                   |

## Supplementary Figures

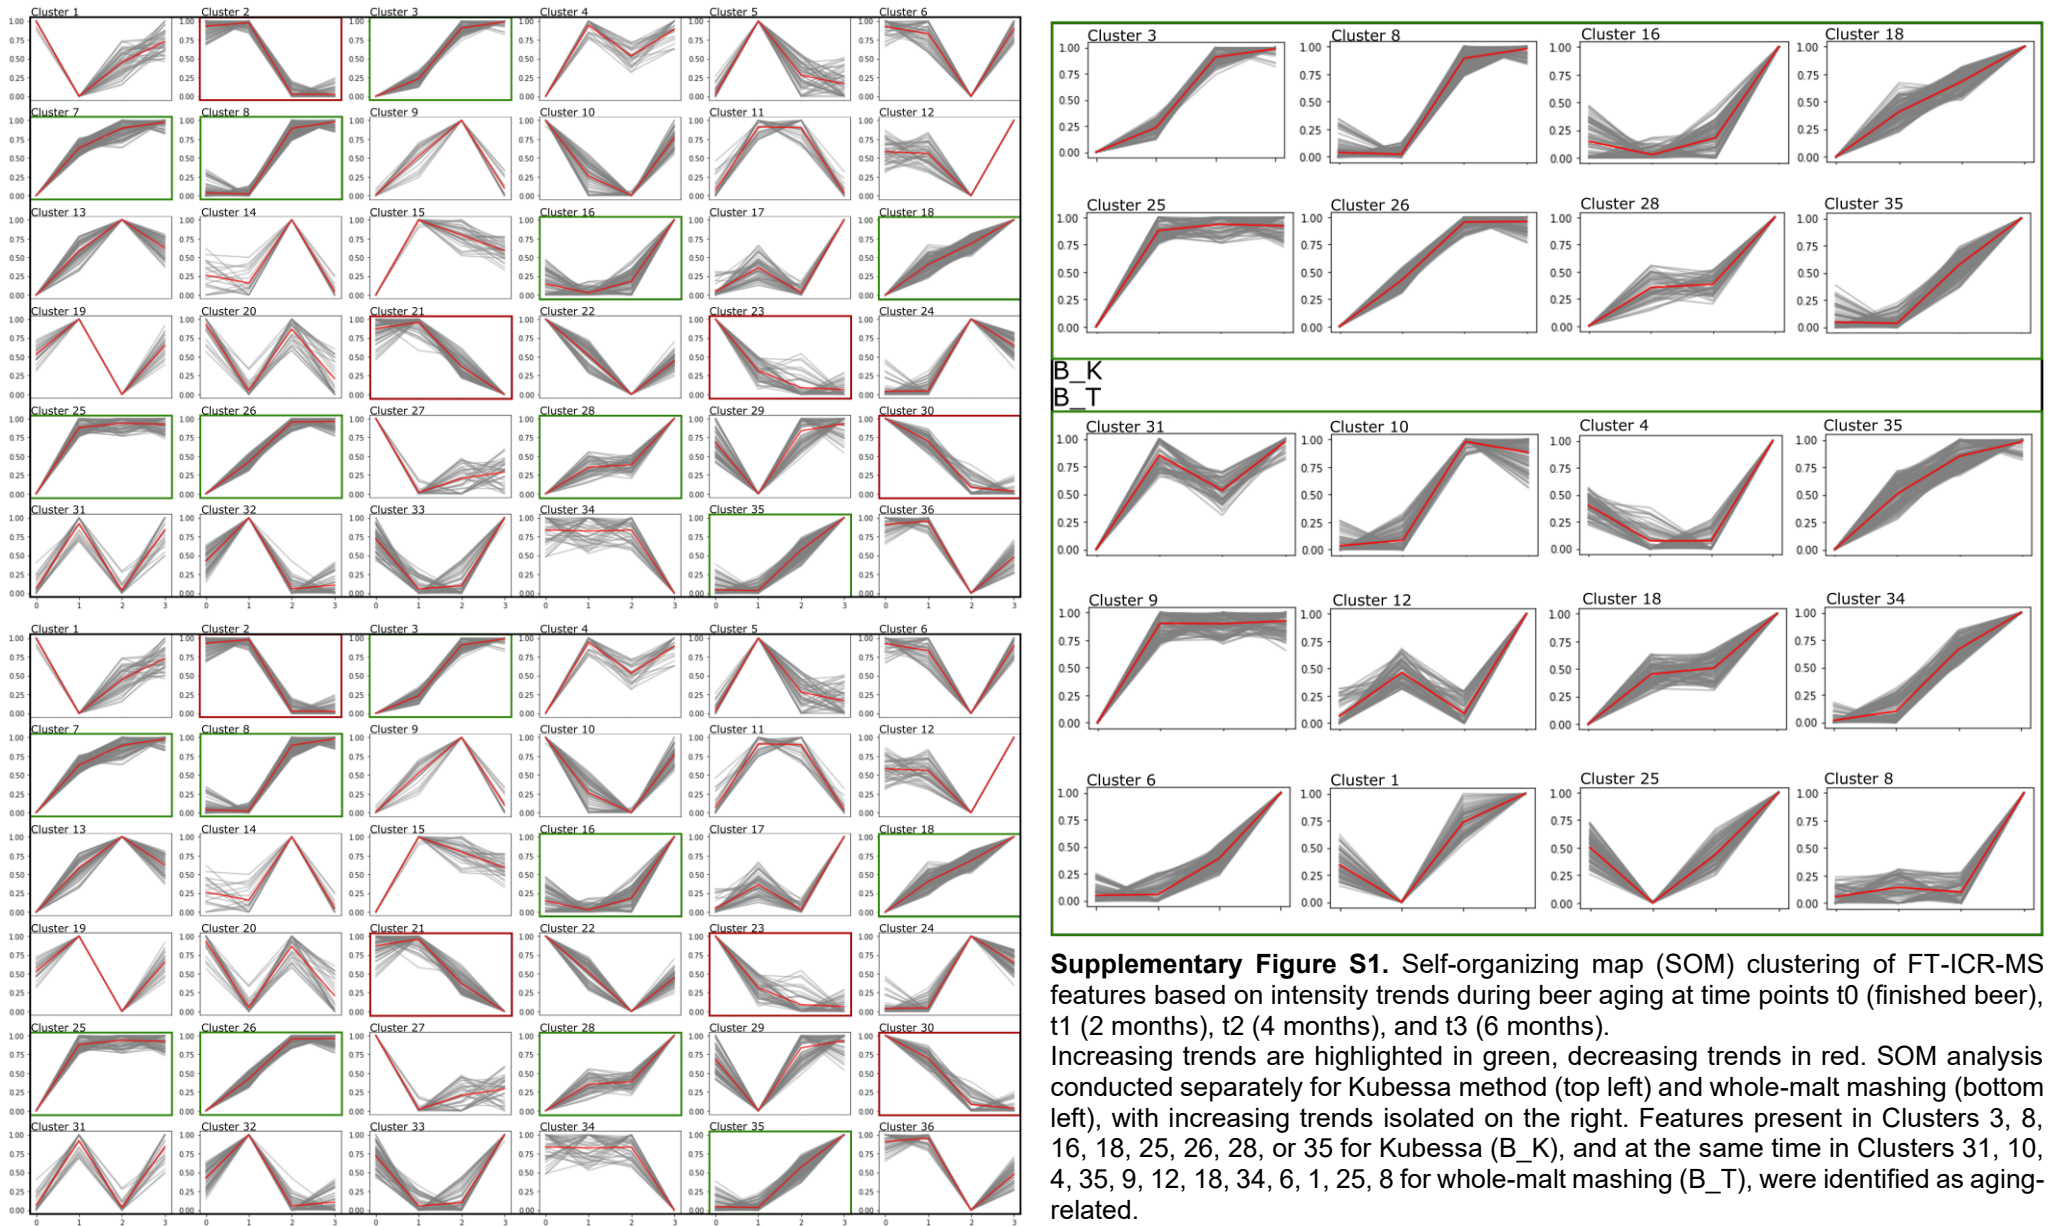

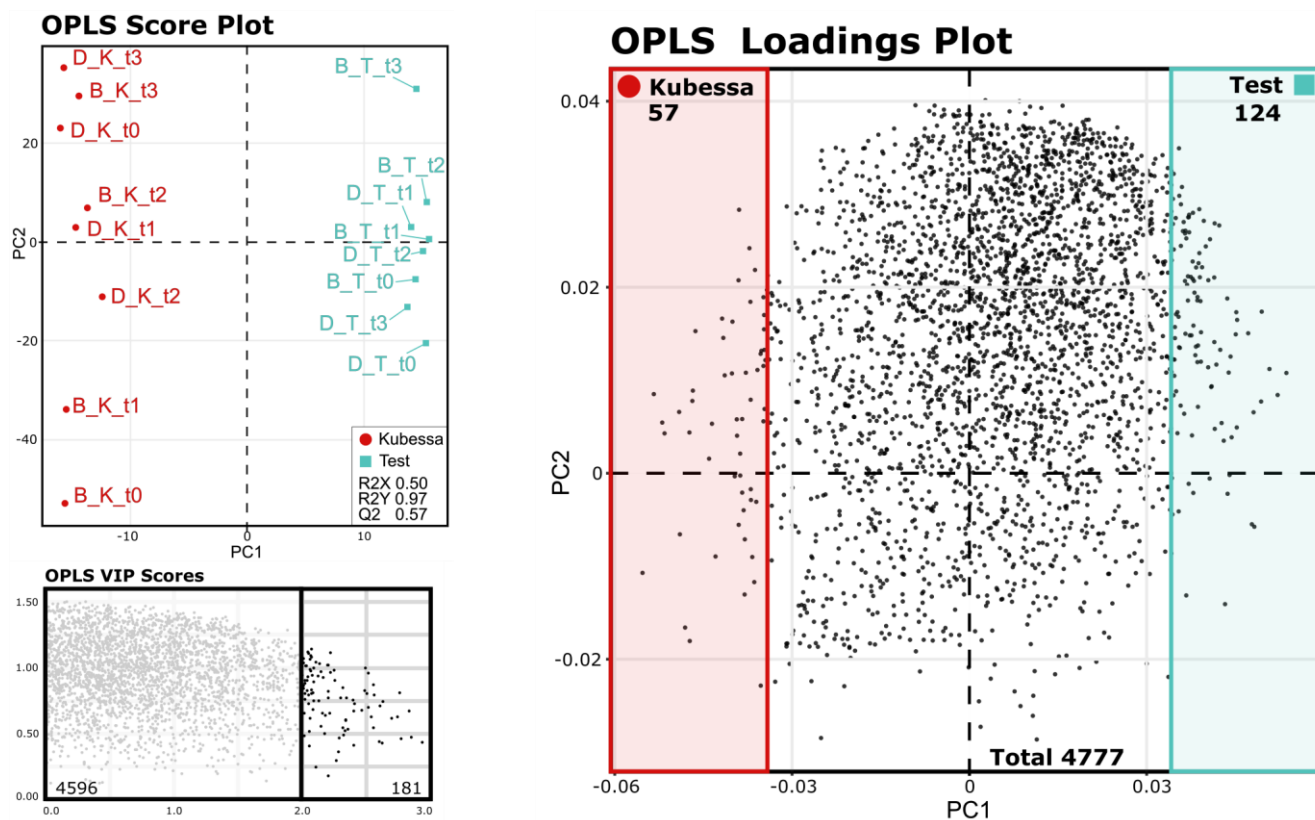

**Supplementary Figure S2.** OPLS-DA statistics of the FT-ICR-MS data with averaged triplicates differentiating beers brewed with the Kubessa method (red) against whole-malt mashing (turquoise). In the score plot (top left), samples are distinctly differentiated. Features with VIP values greater than 2 were identified as particularly significant (bottom left) and are highlighted in the corresponding loadings plot (right).

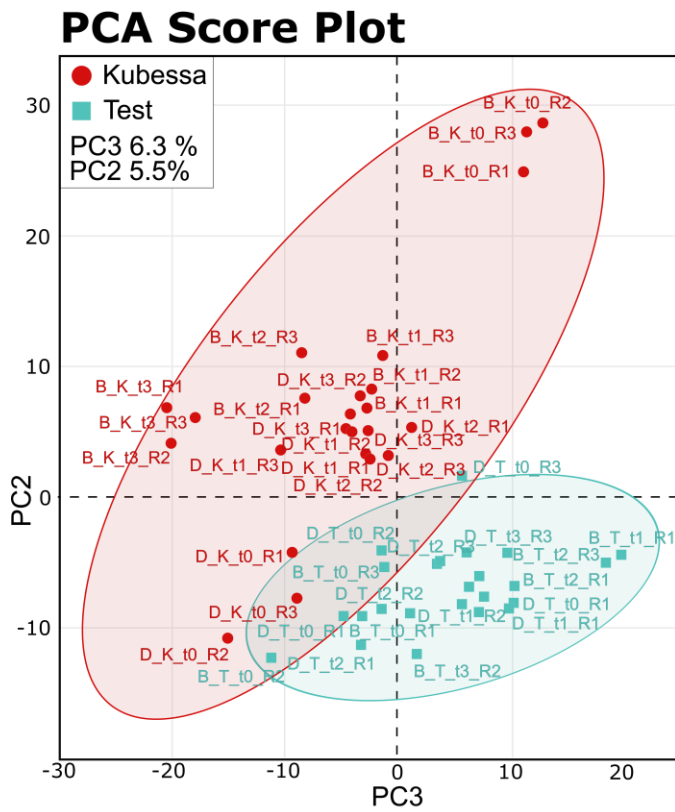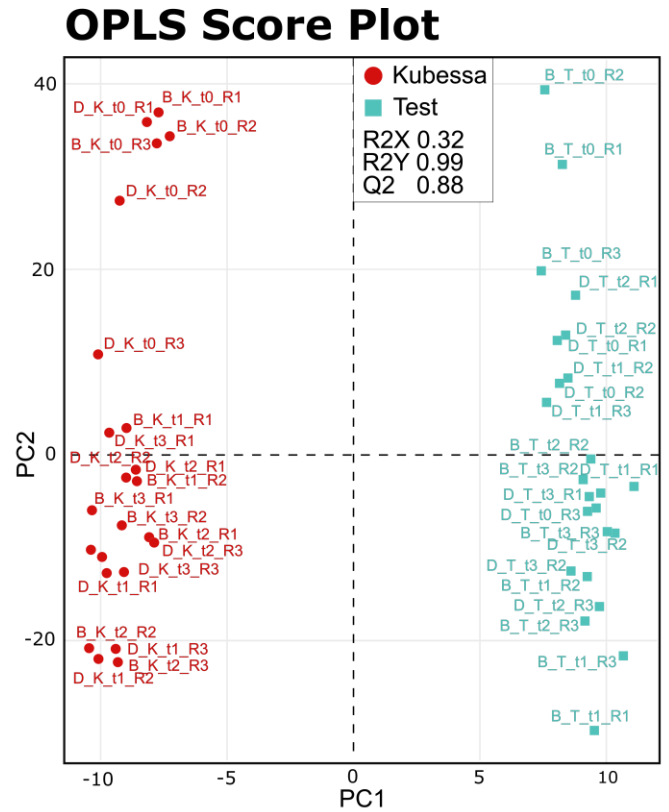

### OPLS Loadings Plot

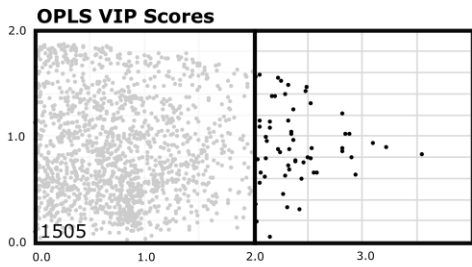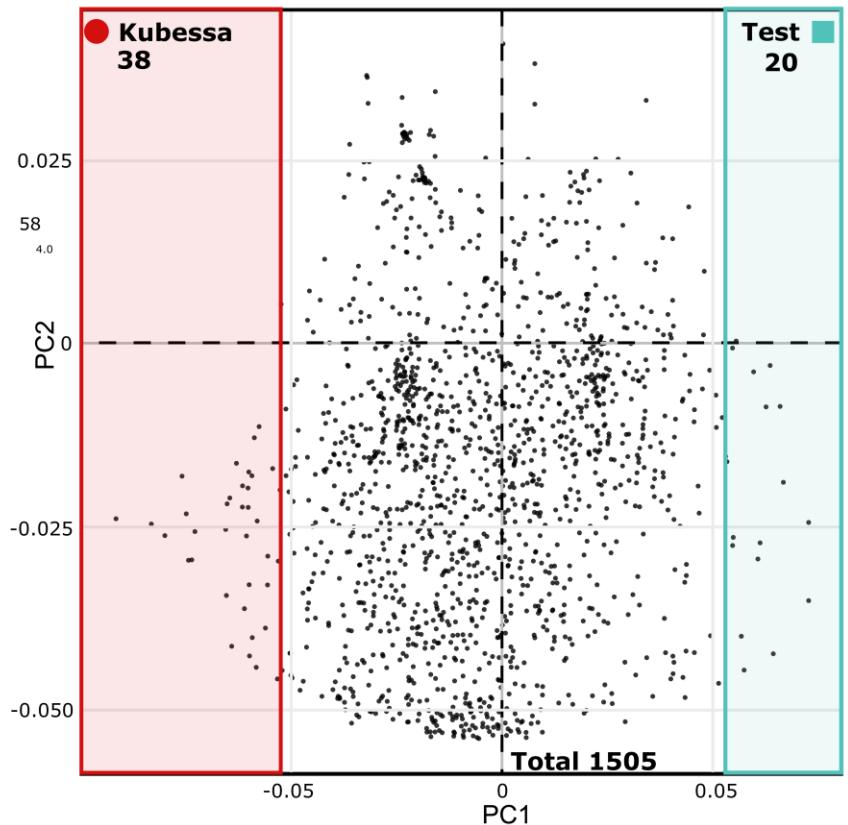

**Supplementary Figure S3.** Statistical analysis of the UPLC-ToF-MS data in triplicates differentiating beers brewed with the Kubessa method (red) against whole-malt mashing (turquoise).

In the score plot of the unsupervised PCA (top left), the samples are already diverging. The OPLS-DA clearly differentiates the brewing lines (top right). Features with VIP values greater than 2 were identified as particularly significant (bottom left) and are highlighted in the corresponding loadings plot (bottom right).

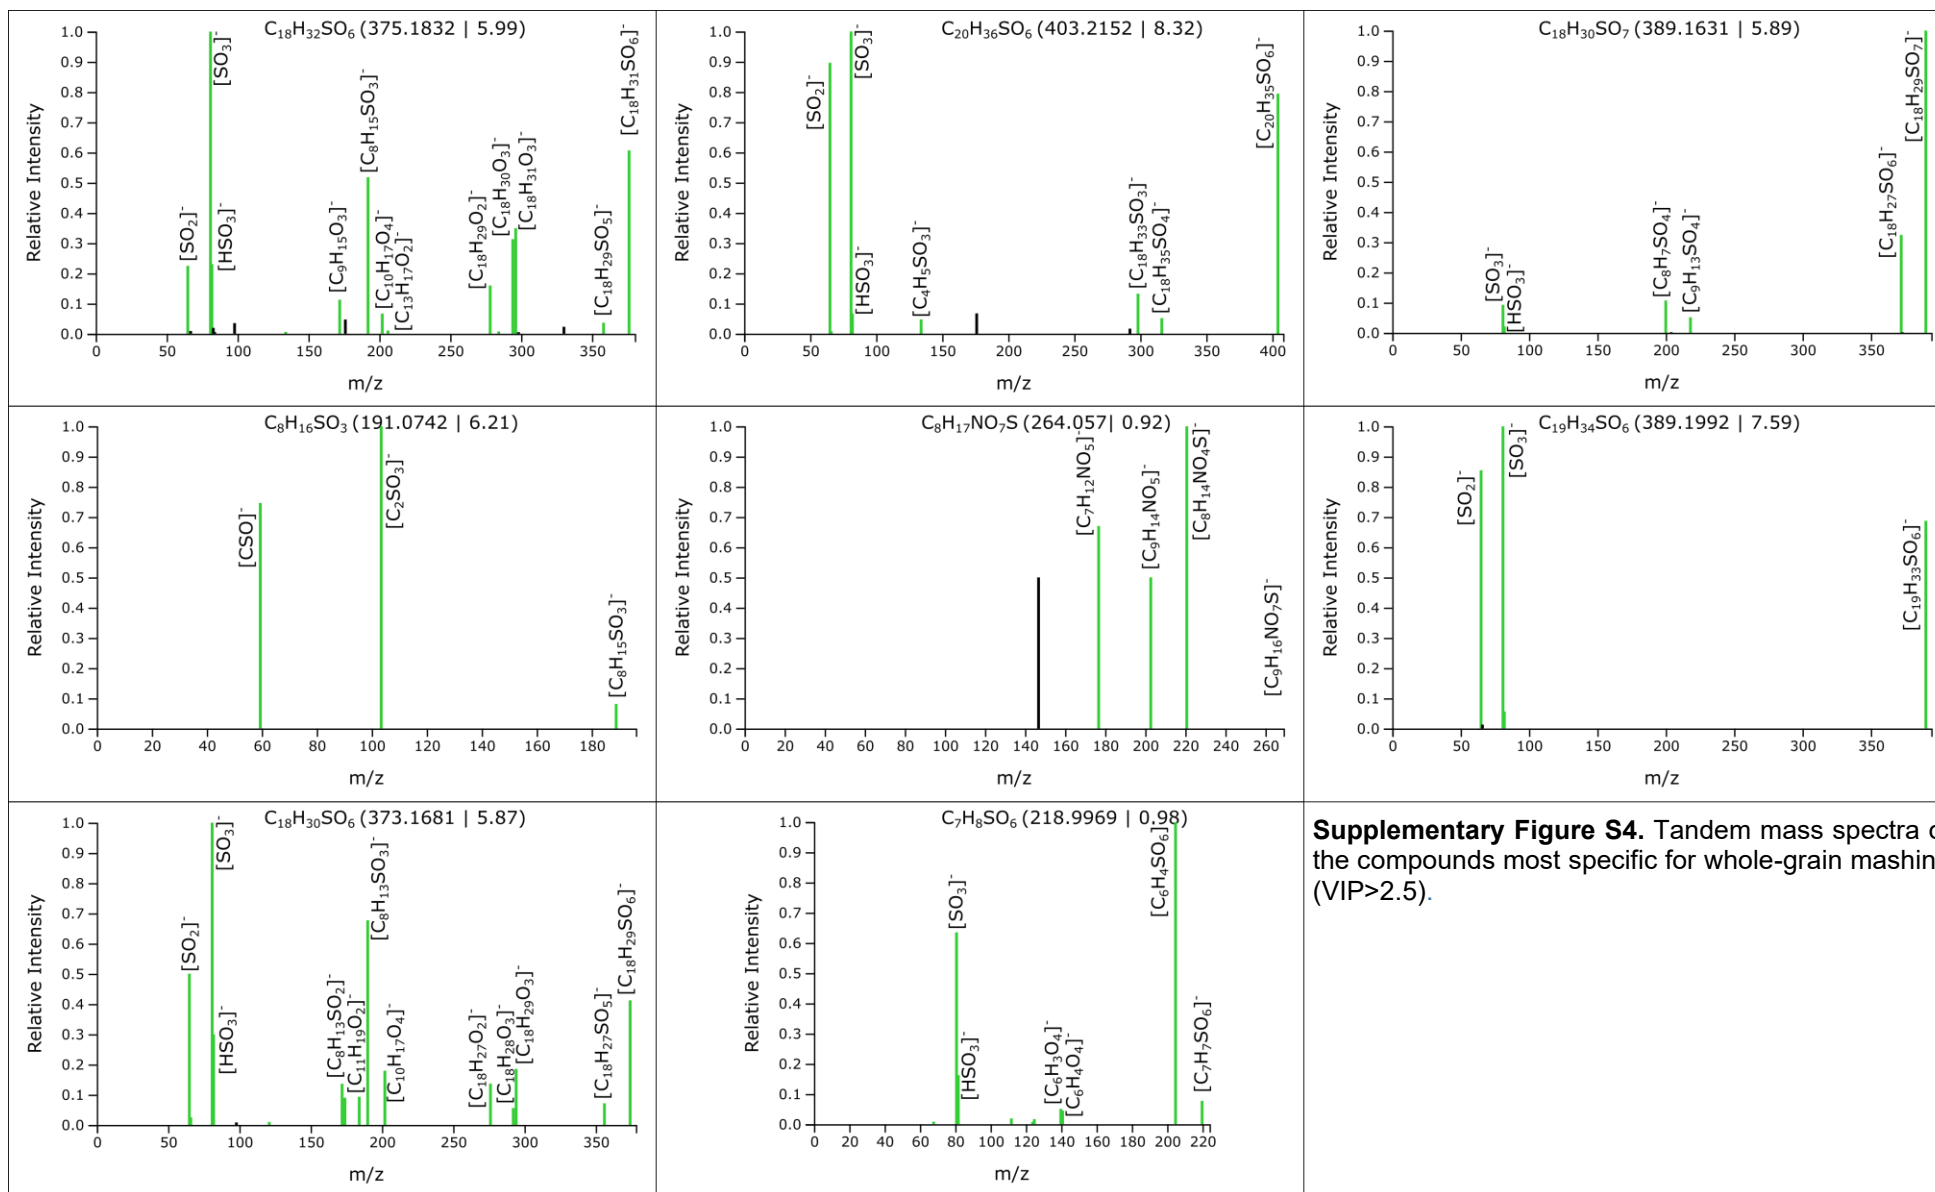

Supplement: jf4c05099_si_001.pdf [file jf4c05099_si_001.pdf]
